# Supplementary material for: LNK deficiency decreases obesity-induced insulin resistance by regulating GLUT4 through the PI3K-Akt-AS160 pathway in adipose tissue
Source: Aging (Albany NY). 2020 Sep 10;12(17):17150–66. doi: 10.18632/aging.103658 (PMC7521507; doi:10.18632/aging.103658)
Supplement: Supplementary Figures [file aging-12-103658-s002..pdf]

## SUPPLEMENTARY FIGURES

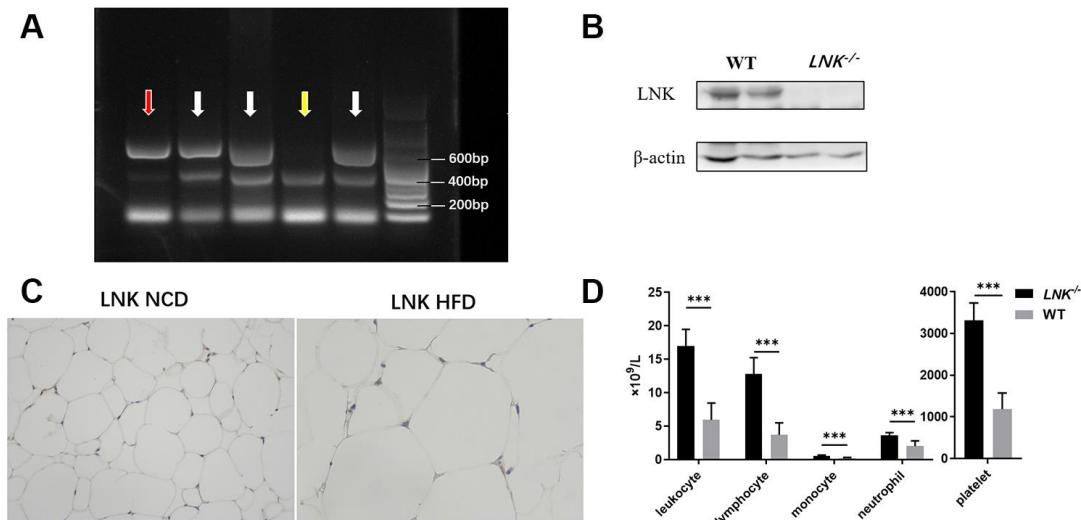

**Supplementary Figure 1. Genotype identification of LNK knockout mice.** (A) Homozygote (red arrow), heterozygote (white arrow), WT (yellow arrow) and marker band were shown. Total DNA was isolated from mice tail between 8-14 days of age, and PCR was performed using oneStep Mouse GenoTyping Kit (PD101-01, Vazyme Biotech, Nanjing, China). Primer sequences: (left of the marker) Mouse Sh2b3-F: 5'-CCAATGTGGCGATAGAGAAAAGGTAAAG-3', (right of the marker) Mouse Sh2b3-Wt/He-F: 5'-TGTCATTTTCATCTTTCTCTGTGGTCC-3', Mouse Sh2b3-R: 5'-CAAACCTCAGGTCAGCCTCTACATAGC-3'. Product Size: delete: 610 bp, WT: 459 bp. Annealing Temp: 60°C. (B) LNK expression in WT and *LNK*<sup>-/-</sup> mice was examined by Western blot analysis using an antibody to LNK. Protein extracts were prepared from the ears. For a ~10 mg piece of ear tissue, add ~200  $\mu$ L of ice cold strong RIPA lysis buffer rapidly to the EP tube, homogenize with an electric homogenizer. Centrifuge for 15 min at 12,000 rpm at 4°C in a microcentrifuge after incubation on ice for 30 min. Gently remove the tubes from the centrifuge and place on ice, aspirate the supernatant and place in a fresh tube kept on ice; discard the pellet. The protein concentration is 1.2 mg/mL. Load 30  $\mu$ g of protein into the wells of the SDS-PAGE gel and run the gel. (C) The immunohistochemical staining for LNK protein in adipose tissues of *LNK*<sup>-/-</sup> mice with NCD or HFD feeding for 16 weeks was shown. (D) Peripheral blood routine examination of *LNK*<sup>-/-</sup> (open symbols, n = 6) and WT (filled symbols, n = 6) male mice between 6-8 weeks of age were measured. Data were shown as mean  $\pm$  S.D. Statistical analysis was performed by Student's *t*-test. \**p*<0.05, \*\**p*<0.01, \*\*\**p*<0.001.

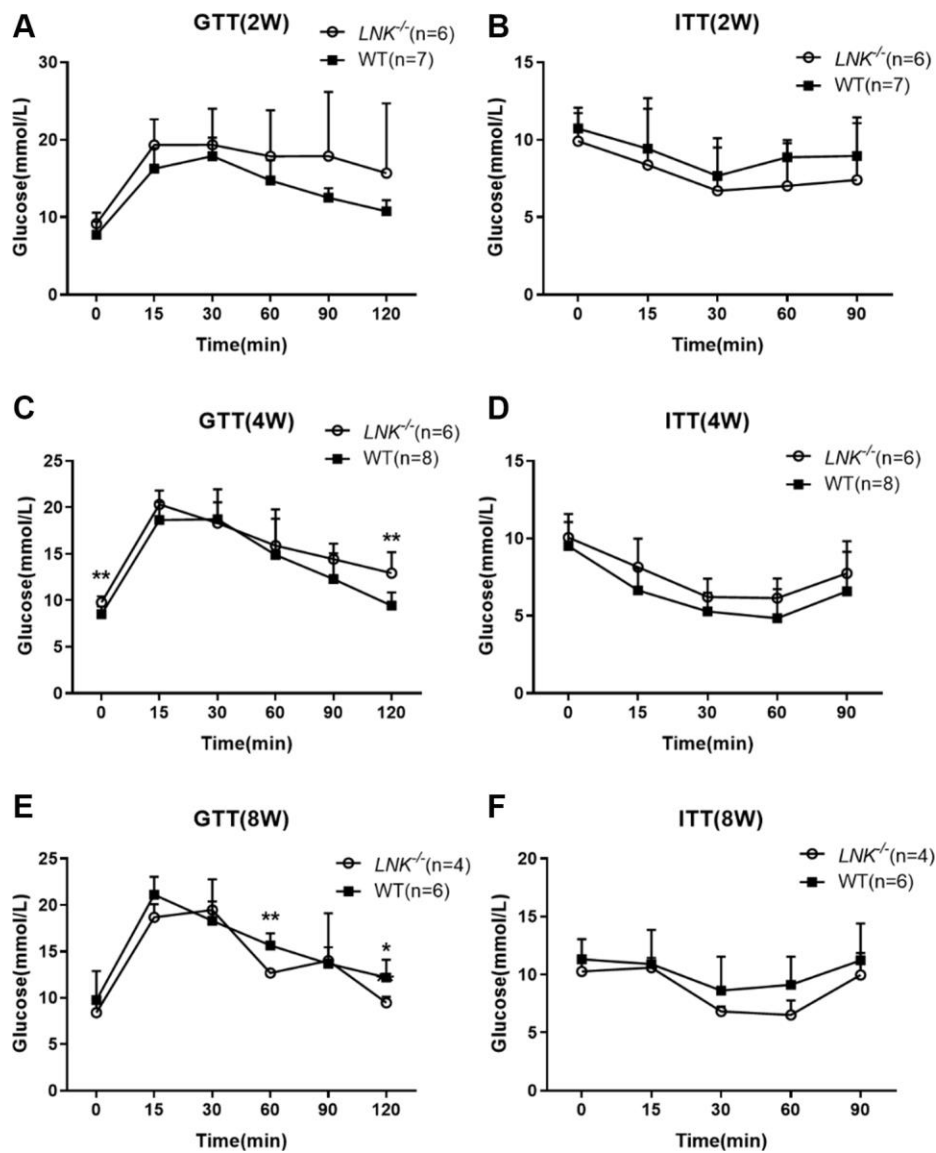

**Supplementary Figure 2. LNK relieved impaired glucose tolerance in HFD feeding mice for 4 weeks, but not at 2 and 8 weeks.** GTTs (A, C and E) and ITTs (B, D and F) in WT (filled symbols, n = 4-6) or  $LNK^{-/-}$  mice (open symbols, n = 6-8) with HFD feeding for 2, 4 and 8 weeks were measured. Data were shown as mean  $\pm$  S.D. Statistical analysis was performed by Student's *t*-test. \**p*<0.05, \*\**p*<0.01.
